# Supplementary material
Source: PubMed Central journal article supplement (PMC5890910)

Fig. S2 Biological pathways potentially influenced by dysregulated miRNAs in aggressive PCa as compared to BPH

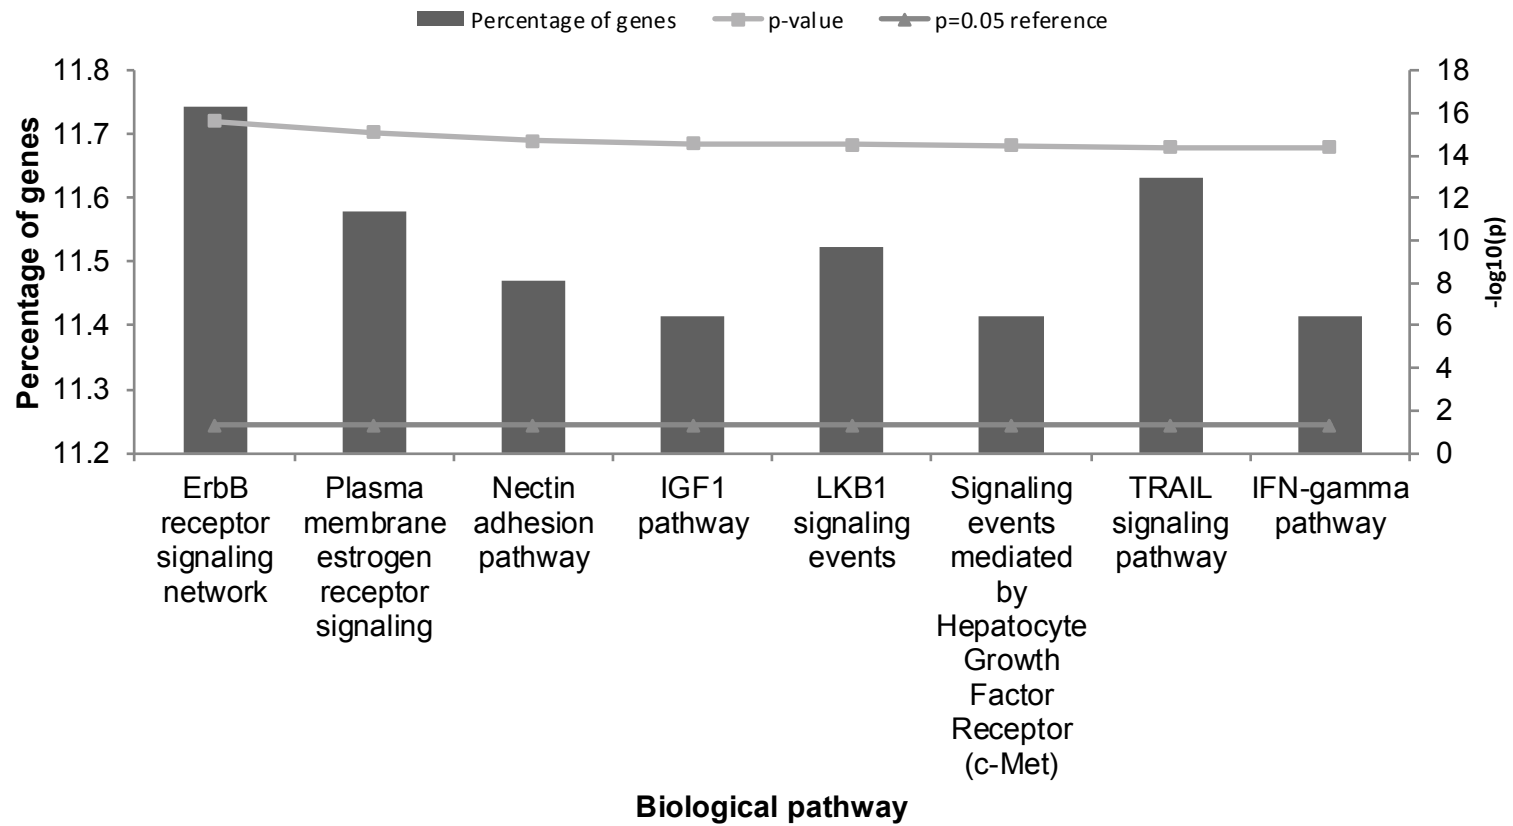

Fig. S3 Exosomal miR-1246 expression patterns differ from circulating miR-1246 expression in sera of prostate cancer patients

A

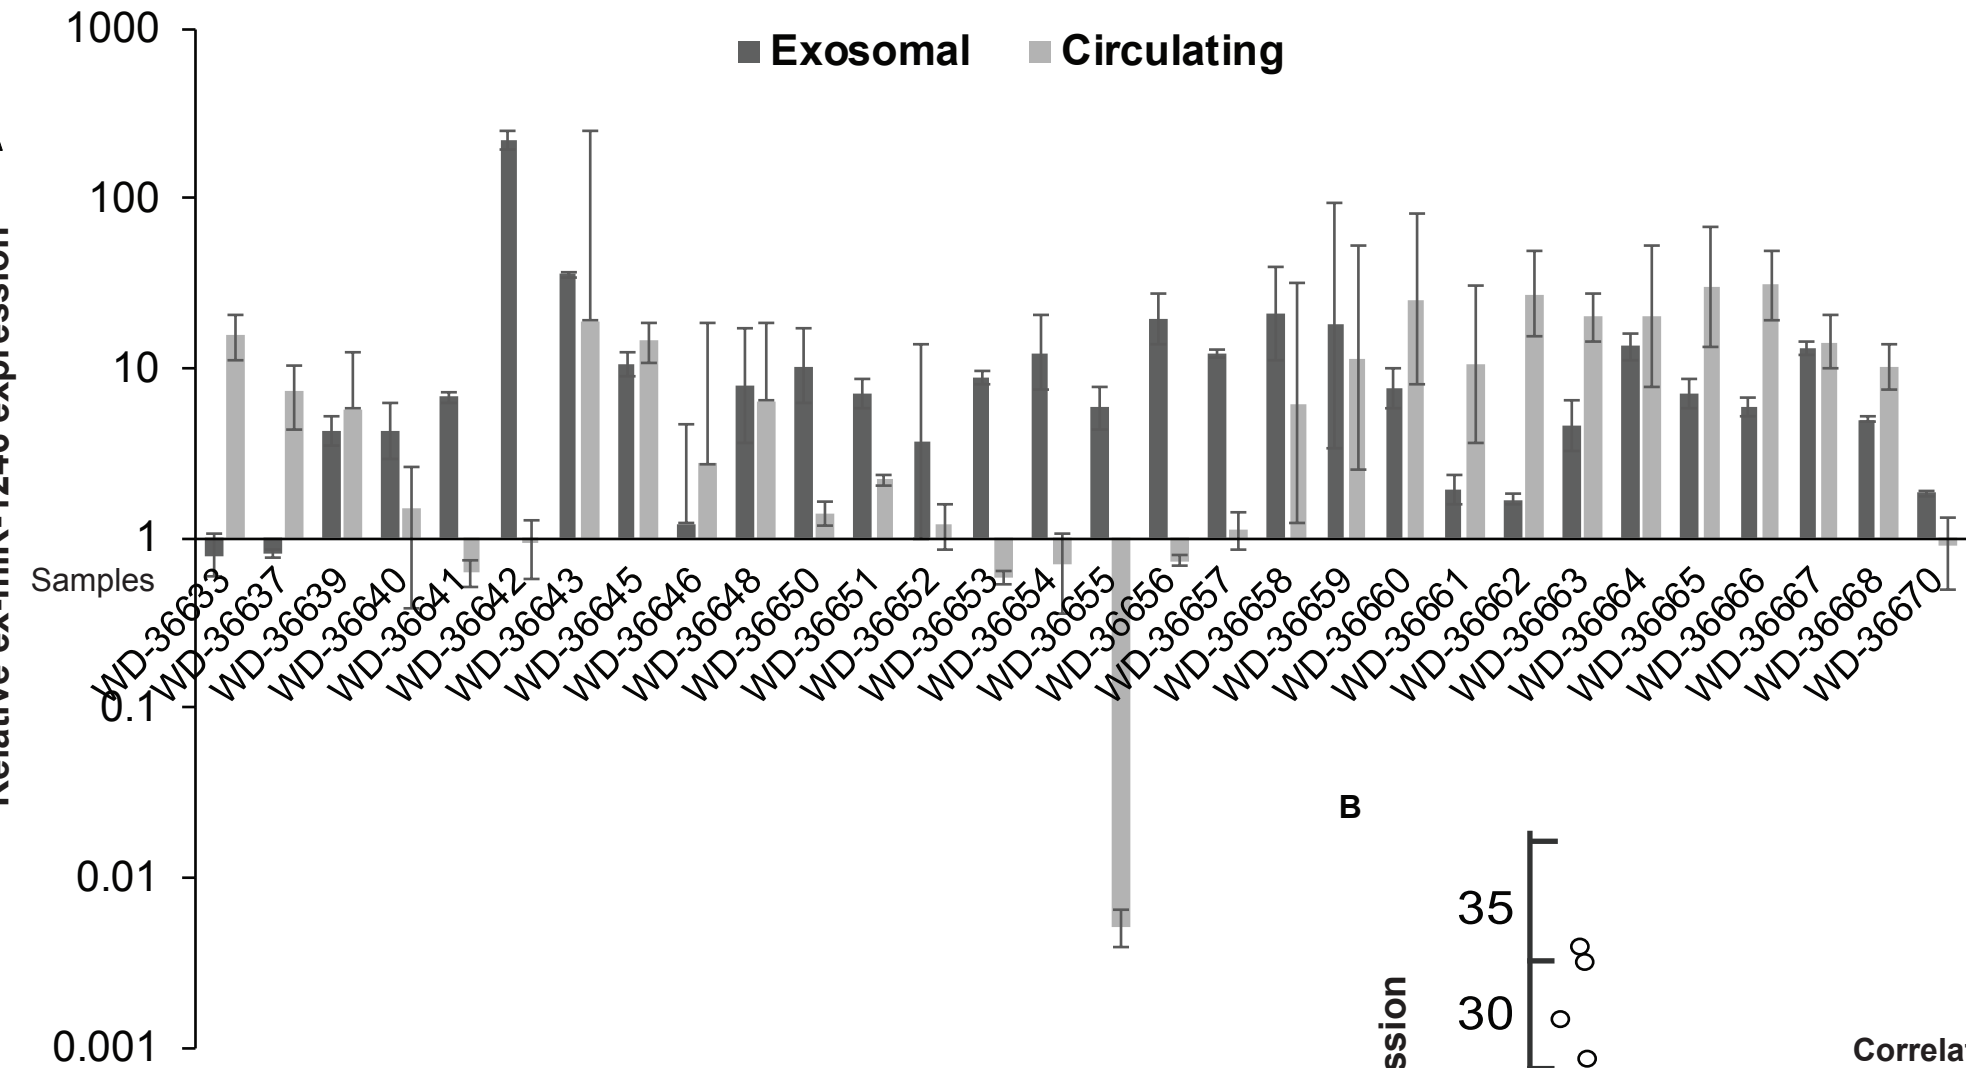

B

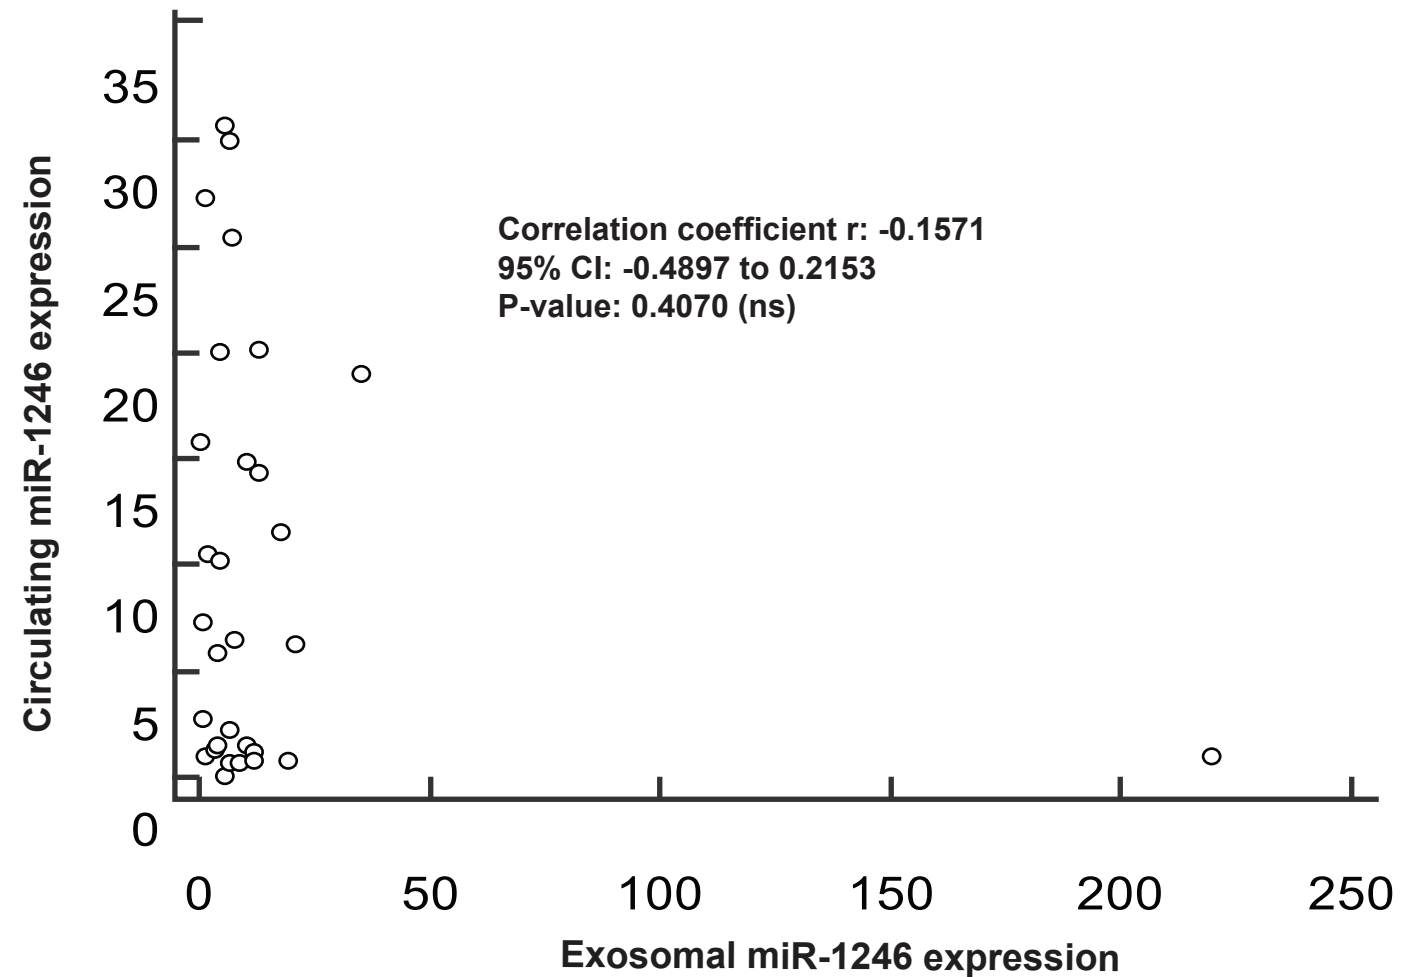

Fig. S4 ex-miR-1246 expression as a measure of PCa aggressiveness

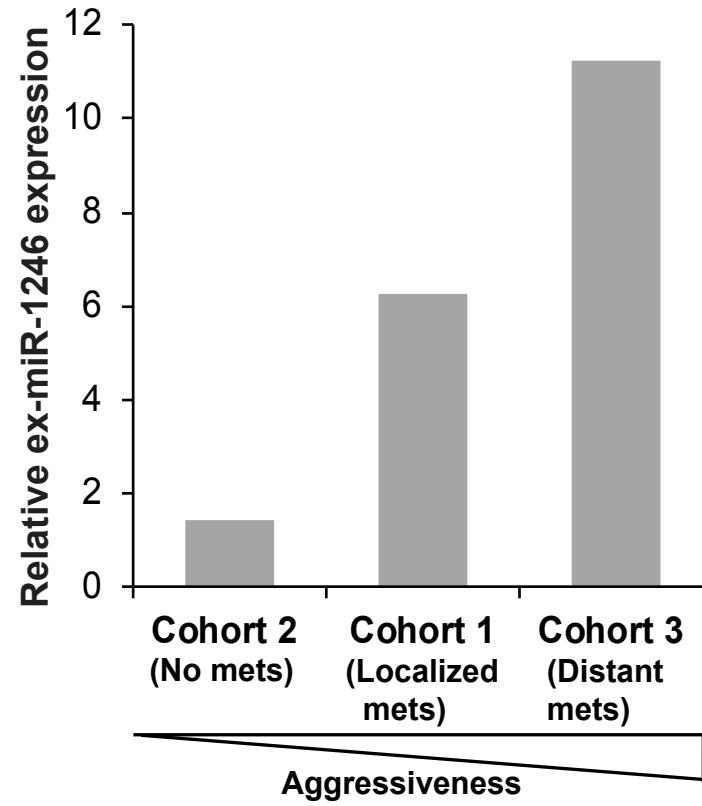

Supplement: NIHMS940386-supplement-2.pdf [file NIHMS940386-supplement-2.pdf]
