# Supplementary material
Source: PubMed Central journal article supplement (PMC5890910)
Supplement: NIHMS940386-supplement-6.pdf [file NIHMS940386-supplement-6.pdf]

**Table S4 Clinicopathologic characteristics of prostate cancer patients**

**A. Clinicopathologic characteristics of training cohort of PCa patients used for ex-miR-1246 profiling**

| <b>Characteristic</b> | <b>Cohort 1 (N=44)</b> | <b>Cohort 2 (N=25*)</b> |
|-----------------------|------------------------|-------------------------|
|                       | <b>N (%)</b>           | <b>N (%)</b>            |
| <b>Age, Years</b>     |                        |                         |
| Mean                  | 64.3                   | 61.2                    |
| Median                | 65.5                   | 62                      |
| Range                 | 46-78                  | 42-76                   |
| <b>T-stage</b>        |                        |                         |
| pT2                   | 4 (9)                  | 16 (64)                 |
| pT3                   | 3 (7)                  | 8 (32)                  |
| pT4                   | 36 (84)                | -                       |
| <b>Gleason Score</b>  |                        |                         |
| 4-6                   | -                      | 1 (4)                   |
| 7 (3+4)               | 12 (28)                | 18 (72)                 |
| 7 (4+3)               | 9 (21)                 | 2 (8)                   |
| 8-10                  | 19 (44)                | 4 (16)                  |
| <b>PSA</b>            |                        |                         |
| Median                | 7.05 (2.6-54)          | 5.6 (3-52)              |
| <b>N-stage</b>        |                        |                         |
| N0/NX                 | 17 (39)                | 25 (100)                |
| N1                    | 26 (59)                | -                       |
| <b>M-stage</b>        |                        |                         |
| M0/MX                 | 44 (100)               | 25 (100)                |
| M1                    | -                      | -                       |

**Pathological diagnosis**

Adenocarcinoma

44 (100)

25 (100)

\* Pathological stage and N-stage unknown for 1 case, Gleason score for 4 cases, PSA for 3 cases

**B. Clinicopathologic characteristics of validation cohort of PCa patients used for ex-miR-1246 profiling (N=43)**

| <b>Characteristic</b>         | <b>N(%)</b>    |
|-------------------------------|----------------|
| <b>Age, Years</b>             |                |
| Mean                          | 66             |
| Median                        | 65             |
| Range                         | 48-80          |
| <b>Gleason Score</b>          |                |
| 4-6                           | 4 (9)          |
| 7 (3+4)                       | 9 (21)         |
| 7 (4+3)                       | 10 (23)        |
| 8-10                          | 16 (37)        |
| <b>PSA</b>                    |                |
| Median                        | 13 (3.3-512.6) |
| <b>M-stage</b>                |                |
| M1                            | 43 (100)       |
| <b>Pathological diagnosis</b> |                |
| Adenocarcinoma                | 43 (100)       |

\* Age unknown for 1 case, Gleason score for 4 cases, PSA for 8 cases

**C. Clinicopathologic characteristics of prostate cancer patients used for miR-1246 profiling in clinical tissues**

| <b>Characteristic</b>         | <b>N (%)</b>     |
|-------------------------------|------------------|
| <b>Age, Years</b>             |                  |
| Mean                          | 63.9             |
| Median                        | 63.5             |
| Range                         | 52-76            |
| <b>T-stage</b>                |                  |
| pT2 or lower                  | 16 (44)          |
| pT3                           | 16 (44)          |
| pT4                           | 3 (8)            |
| <b>Gleason Score</b>          |                  |
| 4-6                           | 8 (22)           |
| 7 (3+4)                       | 14 (39)          |
| 7 (4+3)                       | 6 (17)           |
| 8-10                          | 6 (17)           |
| <b>PSA</b>                    |                  |
| Median                        | 7.55 (<0.1-61.1) |
| <b>N-stage</b>                |                  |
| N0/NX                         | 3 (8)            |
| N1                            | 33 (92)          |
| <b>M-stage</b>                |                  |
| M0/MX                         | 36 (100)         |
| M1                            | -                |
| <b>Pathological diagnosis</b> |                  |
| Adenocarcinoma                | 36 (100)         |

\* Pathological stage unknown for 1 case, Gleason score for 2 cases, PSA for 1 case
